# Supplementary material for: Dynamic tracing of sugar metabolism reveals the mechanisms of action of synthetic sugar analogs
Source: PubMed Central journal article supplement (PMC8966471; doi:10.1093/glycob/cwab106), 2021-10-25
Supplement: supplementary_table_si_cwab106.pdf [file supplementary_table_si_cwab106.pdf]

Table S1. MRM transitions and collision energies of nucleotide sugars and their isotopically labeled or synthetic analogs.

| Compound           | Chemical formula                                                                                | HMDB ID     | Retention time (min) | dMRM time window | monoisotopic mass (amu) | Q1 mass (amu) | Q3 mass (amu) | Collision energy (eV) |
|--------------------|-------------------------------------------------------------------------------------------------|-------------|----------------------|------------------|-------------------------|---------------|---------------|-----------------------|
| UDP-xylose         | C <sub>14</sub> H <sub>22</sub> N <sub>2</sub> O <sub>16</sub> P <sub>2</sub>                   | HMDB0001018 | 9,6                  | 1                | 536,04                  | 535,03        | 79,10         | 30                    |
| UDP-xylose         | C <sub>14</sub> H <sub>22</sub> N <sub>2</sub> O <sub>16</sub> P <sub>2</sub>                   | HMDB0001018 | 9,6                  | 1                | 536,04                  | 535,03        | 323,20        | 20                    |
| 13C5-UDP-xylose    | 13C <sub>5</sub> -C <sub>9</sub> H <sub>22</sub> N <sub>2</sub> O <sub>16</sub> P <sub>2</sub>  |             | 9,6                  | 1                | 541,04                  | 540,03        | 79,10         | 30                    |
| 13C5-UDP-xylose    | 13C <sub>5</sub> -C <sub>9</sub> H <sub>22</sub> N <sub>2</sub> O <sub>16</sub> P <sub>2</sub>  |             | 9,6                  | 1                | 541,04                  | 540,03        | 323,20        | 20                    |
| CDP-ribitol        | C <sub>14</sub> H <sub>25</sub> N <sub>3</sub> O <sub>15</sub> P <sub>2</sub>                   | n.a.        | 4,8                  | 1                | 537,08                  | 536,07        | 78,80         | 50                    |
| CDP-ribitol        | C <sub>14</sub> H <sub>25</sub> N <sub>3</sub> O <sub>15</sub> P <sub>2</sub>                   | n.a.        | 4,8                  | 1                | 537,08                  | 536,07        | 322,00        | 20                    |
| 13C5-CDP-ribitol   | 13C <sub>5</sub> -C <sub>9</sub> H <sub>25</sub> N <sub>3</sub> O <sub>15</sub> P <sub>2</sub>  |             | 4,8                  | 1                | 542,08                  | 541,07        | 78,80         | 50                    |
| 13C5-CDP-ribitol   | 13C <sub>5</sub> -C <sub>9</sub> H <sub>25</sub> N <sub>3</sub> O <sub>15</sub> P <sub>2</sub>  |             | 4,8                  | 1                | 542,08                  | 541,07        | 322,00        | 20                    |
| UDP-galactose      | C <sub>15</sub> H <sub>24</sub> N <sub>2</sub> O <sub>17</sub> P <sub>2</sub>                   | HMDB0012305 | 7,4                  | 1                | 566,06                  | 565,05        | 79,00         | 30                    |
| UDP-galactose      | C <sub>15</sub> H <sub>24</sub> N <sub>2</sub> O <sub>17</sub> P <sub>2</sub>                   | HMDB0012305 | 7,4                  | 1                | 566,06                  | 565,05        | 323,10        | 24                    |
| 13C6-UDP-galactose | 13C <sub>6</sub> -C <sub>9</sub> H <sub>24</sub> N <sub>2</sub> O <sub>17</sub> P <sub>2</sub>  |             | 7,4                  | 1                | 572,06                  | 571,05        | 79,00         | 30                    |
| 13C6-UDP-galactose | 13C <sub>6</sub> -C <sub>9</sub> H <sub>24</sub> N <sub>2</sub> O <sub>17</sub> P <sub>2</sub>  |             | 7,4                  | 1                | 572,06                  | 571,05        | 323,10        | 24                    |
| UDP-glucose        | C <sub>15</sub> H <sub>24</sub> N <sub>2</sub> O <sub>17</sub> P <sub>2</sub>                   | HMDB0000286 | 8,3                  | 1                | 566,06                  | 565,05        | 79,00         | 44                    |
| UDP-glucose        | C <sub>15</sub> H <sub>24</sub> N <sub>2</sub> O <sub>17</sub> P <sub>2</sub>                   | HMDB0000286 | 8,3                  | 1                | 566,06                  | 565,05        | 323,20        | 20                    |
| 13C6-UDP-glucose   | 13C <sub>6</sub> -C <sub>9</sub> H <sub>24</sub> N <sub>2</sub> O <sub>17</sub> P <sub>2</sub>  |             | 8,3                  | 1                | 572,06                  | 571,05        | 79,00         | 44                    |
| 13C6-UDP-glucose   | 13C <sub>6</sub> -C <sub>9</sub> H <sub>24</sub> N <sub>2</sub> O <sub>17</sub> P <sub>2</sub>  |             | 8,3                  | 1                | 572,06                  | 571,05        | 323,20        | 20                    |
| UDP-GalNAc         | C <sub>17</sub> H <sub>27</sub> N <sub>3</sub> O <sub>17</sub> P <sub>2</sub>                   | HMDB0060522 | 10,5                 | 1                | 607,08                  | 606,07        | 78,90         | 50                    |
| UDP-GalNAc         | C <sub>17</sub> H <sub>27</sub> N <sub>3</sub> O <sub>17</sub> P <sub>2</sub>                   | HMDB0060522 | 10,5                 | 1                | 607,08                  | 606,07        | 273,00        | 36                    |
| 13C6-UDP-GalNAc    | 13C <sub>6</sub> -C <sub>11</sub> H <sub>27</sub> N <sub>3</sub> O <sub>17</sub> P <sub>2</sub> |             | 10,5                 | 1                | 613,08                  | 612,07        | 78,90         | 50                    |
| 13C6-UDP-GalNAc    | 13C <sub>6</sub> -C <sub>11</sub> H <sub>27</sub> N <sub>3</sub> O <sub>17</sub> P <sub>2</sub> |             | 10,5                 | 1                | 613,08                  | 612,07        | 273,00        | 36                    |
| UDP-GlcNAc         | C <sub>17</sub> H <sub>27</sub> N <sub>3</sub> O <sub>17</sub> P <sub>2</sub>                   | HMDB0000290 | 10,7                 | 1                | 607,08                  | 606,07        | 282,10        | 30                    |
| UDP-GlcNAc         | C <sub>17</sub> H <sub>27</sub> N <sub>3</sub> O <sub>17</sub> P <sub>2</sub>                   | HMDB0000290 | 10,7                 | 1                | 607,08                  | 606,07        | 385,10        | 28                    |
| 13C6-UDP-GlcNAc    | 13C <sub>6</sub> -C <sub>11</sub> H <sub>27</sub> N <sub>3</sub> O <sub>17</sub> P <sub>2</sub> |             | 10,7                 | 1                | 613,08                  | 612,07        | 282,10        | 30                    |
| 13C6-UDP-GlcNAc    | 13C <sub>6</sub> -C <sub>11</sub> H <sub>27</sub> N <sub>3</sub> O <sub>17</sub> P <sub>2</sub> |             | 10,7                 | 1                | 613,08                  | 612,07        | 385,10        | 28                    |
| UDP-HexNPoc        | C <sub>19</sub> H <sub>27</sub> N <sub>3</sub> O <sub>18</sub> P <sub>2</sub>                   | n.a.        | 18,0                 | 1                | 647,08                  | 646,07        | 282,10        | 30                    |
| UDP-HexNPoc        | C <sub>19</sub> H <sub>27</sub> N <sub>3</sub> O <sub>18</sub> P <sub>2</sub>                   | n.a.        | 18,0                 | 1                | 647,08                  | 646,07        | 282,10        | 30                    |
| CMP-NeuNAc         | C <sub>20</sub> H <sub>31</sub> N <sub>4</sub> O <sub>16</sub> P                                | HMDB0001176 | 6,3                  | 1                | 614,15                  | 613,14        | 78,90         | 54                    |
| CMP-NeuNAc         | C <sub>20</sub> H <sub>31</sub> N <sub>4</sub> O <sub>16</sub> P                                | HMDB0001176 | 6,3                  | 1                | 614,15                  | 613,14        | 321,90        | 20                    |
| 13C6-CMP-NeuNAc    | 13C <sub>6</sub> -C <sub>14</sub> H <sub>31</sub> N <sub>4</sub> O <sub>16</sub> P              |             | 6,3                  | 1                | 620,15                  | 619,14        | 78,90         | 54                    |
| 13C6-CMP-NeuNAc    | 13C <sub>6</sub> -C <sub>14</sub> H <sub>31</sub> N <sub>4</sub> O <sub>16</sub> P              |             | 6,3                  | 1                | 620,15                  | 619,14        | 321,90        | 20                    |
| CMP-3Fax-NeuNAc    | C <sub>20</sub> H <sub>30</sub> FN <sub>4</sub> O <sub>16</sub> P                               | n.a.        | 5,8                  | 1                | 632,13                  | 631,13        | 78,90         | 54                    |
| CMP-3Fax-NeuNAc    | C <sub>20</sub> H <sub>30</sub> FN <sub>4</sub> O <sub>16</sub> P                               | n.a.        | 5,8                  | 1                | 632,13                  | 631,13        | 321,90        | 20                    |
| CMP-NeuNPoc        | C <sub>22</sub> H <sub>31</sub> N <sub>4</sub> O <sub>17</sub> P                                | n.a.        | 16,2                 | 1                | 654,13                  | 653,13        | 78,90         | 54                    |
| CMP-NeuNPoc        | C <sub>22</sub> H <sub>31</sub> N <sub>4</sub> O <sub>17</sub> P                                | n.a.        | 16,2                 | 1                | 654,13                  | 653,13        | 321,90        | 20                    |
| CMP-NeuNGc         | C <sub>20</sub> H <sub>31</sub> N <sub>4</sub> O <sub>17</sub> P                                | HMDB0012206 | 16,2                 | 1                | 630,14                  | 629,13        | 78,90         | 54                    |
| CMP-NeuNGc         | C <sub>20</sub> H <sub>31</sub> N <sub>4</sub> O <sub>17</sub> P                                | HMDB0012206 | 16,2                 | 1                | 630,14                  | 629,13        | 321,90        | 20                    |
| 13C6-CMP-NeuNGc    | 13C <sub>6</sub> -C <sub>14</sub> H <sub>31</sub> N <sub>4</sub> O <sub>17</sub> P              |             | 16,2                 | 1                | 636,14                  | 635,13        | 78,90         | 54                    |
| 13C6-CMP-NeuNGc    | 13C <sub>6</sub> -C <sub>14</sub> H <sub>31</sub> N <sub>4</sub> O <sub>17</sub> P              |             | 16,2                 | 1                | 636,14                  | 635,13        | 321,90        | 20                    |
| GDP-glucose        | C <sub>16</sub> H <sub>25</sub> N <sub>5</sub> O <sub>16</sub> P <sub>2</sub>                   | HMDB0003351 | 14,9                 | 2                | 605,08                  | 604,07        | 362,00        | 24                    |
| GDP-glucose        | C <sub>16</sub> H <sub>25</sub> N <sub>5</sub> O <sub>16</sub> P <sub>2</sub>                   | HMDB0003351 | 14,9                 | 2                | 605,08                  | 604,07        | 78,90         | 44                    |
| 13C6-GDP-glucose   | 13C <sub>6</sub> -C <sub>10</sub> H <sub>25</sub> N <sub>5</sub> O <sub>16</sub> P <sub>2</sub> |             | 14,9                 | 2                | 611,08                  | 610,07        | 362,00        | 24                    |
| 13C6-GDP-glucose   | 13C <sub>6</sub> -C <sub>10</sub> H <sub>25</sub> N <sub>5</sub> O <sub>16</sub> P <sub>2</sub> |             | 14,9                 | 2                | 611,08                  | 610,07        | 78,90         | 44                    |
| GDP-mannose        | C <sub>16</sub> H <sub>25</sub> N <sub>5</sub> O <sub>16</sub> P <sub>2</sub>                   | HMDB0001163 | 13,6                 | 2                | 605,08                  | 604,07        | 424,00        | 32                    |
| GDP-mannose        | C <sub>16</sub> H <sub>25</sub> N <sub>5</sub> O <sub>16</sub> P <sub>2</sub>                   | HMDB0001163 | 13,6                 | 2                | 605,08                  | 604,07        | 78,80         | 68                    |
| 13C6-GDP-mannose   | 13C <sub>6</sub> -C <sub>10</sub> H <sub>25</sub> N <sub>5</sub> O <sub>16</sub> P <sub>2</sub> |             | 13,6                 | 2                | 611,08                  | 610,07        | 78,80         | 68                    |
| 13C6-GDP-mannose   | 13C <sub>6</sub> -C <sub>10</sub> H <sub>25</sub> N <sub>5</sub> O <sub>16</sub> P <sub>2</sub> |             | 13,6                 | 2                | 611,08                  | 610,07        | 424,00        | 32                    |
| GDP-fucose         | C <sub>16</sub> H <sub>25</sub> N <sub>5</sub> O <sub>15</sub> P <sub>2</sub>                   | HMDB0252660 | 17,1                 | 2                | 589,08                  | 588,07        | 442,00        | 20                    |
| GDP-fucose         | C <sub>16</sub> H <sub>25</sub> N <sub>5</sub> O <sub>15</sub> P <sub>2</sub>                   | HMDB0252660 | 17,1                 | 2                | 589,08                  | 588,07        | 424,00        | 28                    |
| GDP-fucose         | C <sub>16</sub> H <sub>25</sub> N <sub>5</sub> O <sub>15</sub> P <sub>2</sub>                   | HMDB0252660 | 17,1                 | 2                | 589,08                  | 588,07        | 78,90         | 50                    |
| 13C6-GDP-fucose    | 13C <sub>6</sub> -C <sub>10</sub> H <sub>25</sub> N <sub>5</sub> O <sub>15</sub> P <sub>2</sub> |             | 17,1                 | 2                | 595,08                  | 594,07        | 442,00        | 20                    |
| 13C6-GDP-fucose    | 13C <sub>6</sub> -C <sub>10</sub> H <sub>25</sub> N <sub>5</sub> O <sub>15</sub> P <sub>2</sub> |             | 17,1                 | 2                | 595,08                  | 594,07        | 424,00        | 28                    |
| 13C6-GDP-fucose    | 13C <sub>6</sub> -C <sub>10</sub> H <sub>25</sub> N <sub>5</sub> O <sub>15</sub> P <sub>2</sub> |             | 17,1                 | 2                | 595,08                  | 594,07        | 78,90         | 50                    |
| ADP-glucose        | C <sub>16</sub> H <sub>25</sub> N <sub>5</sub> O <sub>15</sub> P <sub>2</sub>                   | HMDB0006557 | 19,9                 | 2                | 589,08                  | 588,07        | 346,20        | 24                    |
| ADP-glucose        | C <sub>16</sub> H <sub>25</sub> N <sub>5</sub> O <sub>15</sub> P <sub>2</sub>                   | HMDB0006557 | 19,9                 | 2                | 589,08                  | 588,07        | 241,10        | 28                    |
| 13C6-ADP-glucose   | 13C <sub>6</sub> -C <sub>10</sub> H <sub>25</sub> N <sub>5</sub> O <sub>15</sub> P <sub>2</sub> |             | 19,9                 | 2                | 595,08                  | 594,07        | 346,20        | 24                    |
| 13C6-ADP-glucose   | 13C <sub>6</sub> -C <sub>10</sub> H <sub>25</sub> N <sub>5</sub> O <sub>15</sub> P <sub>2</sub> |             | 19,9                 | 2                | 595,08                  | 594,07        | 241,10        | 28                    |
| UDP-GlcA           | C <sub>15</sub> H <sub>22</sub> N <sub>2</sub> O <sub>18</sub> P <sub>2</sub>                   | HMDB0000935 | 15,4                 | 2                | 580,03                  | 579,02        | 403,00        | 20                    |
| UDP-GlcA           | C <sub>15</sub> H <sub>22</sub> N <sub>2</sub> O <sub>18</sub> P <sub>2</sub>                   | HMDB0000935 | 15,4                 | 2                | 580,03                  | 579,02        | 158,90        | 42                    |
| 13C6-UDP-GlcA      | 13C <sub>6</sub> -C <sub>9</sub> H <sub>22</sub> N <sub>2</sub> O <sub>18</sub> P <sub>2</sub>  |             | 15,4                 | 2                | 586,03                  | 585,02        | 403,00        | 20                    |
| 13C6-UDP-GlcA      | 13C <sub>6</sub> -C <sub>9</sub> H <sub>22</sub> N <sub>2</sub> O <sub>18</sub> P <sub>2</sub>  |             | 15,4                 | 2                | 586,03                  | 585,02        | 158,90        | 42                    |
| ADP-ribose         | C <sub>15</sub> H <sub>23</sub> N <sub>5</sub> O <sub>14</sub> P <sub>2</sub>                   | HMDB0248024 | 20,0                 | 2                | 559,07                  | 558,06        | 346,20        | 24                    |
| ADP-ribose         | C <sub>15</sub> H <sub>23</sub> N <sub>5</sub> O <sub>14</sub> P <sub>2</sub>                   | HMDB0248024 | 20,0                 | 2                | 559,07                  | 558,06        | 78,80         | 64                    |
| 13C5-ADP-ribose    | 13C <sub>5</sub> -C <sub>10</sub> H <sub>23</sub> N <sub>5</sub> O <sub>14</sub> P <sub>2</sub> |             | 20,0                 | 2                | 564,07                  | 563,06        | 346,20        | 24                    |
| 13C5-ADP-ribose    | 13C <sub>5</sub> -C <sub>10</sub> H <sub>23</sub> N <sub>5</sub> O <sub>14</sub> P <sub>2</sub> |             | 20,0                 | 2                | 564,07                  | 563,06        | 78,80         | 64                    |
| dTDP-glucose       | C <sub>16</sub> H <sub>26</sub> N <sub>2</sub> O <sub>16</sub> P <sub>2</sub>                   | HMDB0001328 | 18,8                 | 2                | 564,08                  | 563,07        | 321,00        | 20                    |
| dTDP-glucose       | C <sub>16</sub> H <sub>26</sub> N <sub>2</sub> O <sub>16</sub> P <sub>2</sub>                   | HMDB0001328 | 18,8                 | 2                | 564,08                  | 563,07        | 79,10         | 48                    |
| 13C6-dTDP-glucose  | 13C <sub>6</sub> -C <sub>10</sub> H <sub>26</sub> N <sub>2</sub> O <sub>16</sub> P <sub>2</sub> |             | 18,8                 | 2                | 570,08                  | 569,07        | 321,00        | 20                    |
| 13C6-dTDP-glucose  | 13C <sub>6</sub> -C <sub>10</sub> H <sub>26</sub> N <sub>2</sub> O <sub>16</sub> P <sub>2</sub> |             | 18,8                 | 2                | 570,08                  | 569,07        | 79,10         | 48                    |
| dTDP-rhamnose      | C <sub>16</sub> H <sub>26</sub> N <sub>2</sub> O <sub>15</sub> P <sub>2</sub>                   | HMDB0006354 | 19,3                 | 2                | 548,08                  | 547,07        | 321,00        | 20                    |
| dTDP-rhamnose      | C <sub>16</sub> H <sub>26</sub> N <sub>2</sub> O <sub>15</sub> P <sub>2</sub>                   | HMDB0006354 | 19,3                 | 2                | 548,08                  | 547,07        | 79,10         | 48                    |
| 13C6-dTDP-rhamnose | 13C <sub>6</sub> -C <sub>10</sub> H <sub>26</sub> N <sub>2</sub> O <sub>15</sub> P <sub>2</sub> |             | 19,3                 | 2                | 554,08                  | 553,07        | 321,00        | 20                    |
| 13C6-dTDP-rhamnose | 13C <sub>6</sub> -C <sub>10</sub> H <sub>26</sub> N <sub>2</sub> O <sub>15</sub> P <sub>2</sub> |             | 19,3                 | 2                | 554,08                  | 553,07        | 79,10         | 48                    |
| UDP-Arabinose      | C <sub>14</sub> H <sub>22</sub> N <sub>2</sub> O <sub>16</sub> P <sub>2</sub>                   | HMDB0012303 | 7,1                  | 1                | 536,04                  | 535,03        | 322,90        | 20                    |
| UDP-Arabinose      | C <sub>14</sub> H <sub>22</sub> N <sub>2</sub> O <sub>16</sub> P <sub>2</sub>                   | HMDB0012303 | 7,1                  | 1                | 536,04                  | 535,03        | 78,90         | 30                    |
| 13C5-UDP-Arabinose | 13C <sub>5</sub> -C <sub>9</sub> H <sub>22</sub> N <sub>2</sub> O <sub>16</sub> P <sub>2</sub>  |             | 7,1                  | 1                | 541,04                  | 540,03        | 322,90        | 20                    |
| 13C5-UDP-Arabinose | 13C <sub>5</sub> -C <sub>9</sub> H <sub>22</sub> N <sub>2</sub> O <sub>16</sub> P <sub>2</sub>  |             | 7,1                  | 1                | 541,04                  | 540,03        | 78,90         | 30                    |
| UDP-ManNAc         | C <sub>17</sub> H <sub>27</sub> N <sub>3</sub> O <sub>17</sub> P <sub>2</sub>                   | HMDB0013112 | 18,1                 | 1                | 607,08                  | 606,07        | 78,90         | 50                    |
| UDP-ManNAc         | C <sub>17</sub> H <sub>27</sub> N <sub>3</sub> O <sub>17</sub> P <sub>2</sub>                   | HMDB0013112 | 18,1                 | 1                | 607,08                  | 606,07        | 273,00        | 36                    |
