# Supplementary material for: Dynamic tracing of sugar metabolism reveals the mechanisms of action of synthetic sugar analogs
Source: PubMed Central journal article supplement (PMC8966471; doi:10.1093/glycob/cwab106), 2021-10-25
Supplement: supplementary_table_sii_cwab106.pdf [file supplementary_table_sii_cwab106.pdf]

Table SII. Acquisition parameters and results of validation for 14 nucleotide sugars.

| Compound      | HMDB ID     | Retention time (min) | Lower limit of detection (µM) | Lower limit of quantification (µM) | Linear range (log3) | Monoisotopic mass (amu) | Q1 mass (amu) | Q3 mass (amu) | Collision energy (eV) | Quantifier/Qualifier |
|---------------|-------------|----------------------|-------------------------------|------------------------------------|---------------------|-------------------------|---------------|---------------|-----------------------|----------------------|
| CMP-NeuNAc    | HMDB0001176 | 6,3                  | 0,001                         | 0,003                              | 3 nM - 3,13 µM      | 614,15                  | 613,10        | 321,90        | 20                    | Quantifier           |
| CMP-NeuNAc    | HMDB0001176 | 6,3                  | 0,001                         | 0,003                              | 3 nM - 3,13 µM      | 614,15                  | 613,10        | 78,90         | 54                    | Qualifier            |
| UDP-galactose | HMDB0000302 | 7,4                  | 0,001                         | 0,003                              | 3 nM - 6,25 µM      | 566,06                  | 565,10        | 323,10        | 24                    | Qualifier            |
| UDP-galactose | HMDB0000302 | 7,4                  | 0,001                         | 0,003                              | 3 nM - 6,25 µM      | 566,06                  | 565,10        | 79,00         | 30                    | Qualifier            |
| UDP-glucose   | HMDB0000286 | 8,3                  | 0,001                         | 0,003                              | 3 nM - 6,25 µM      | 566,06                  | 565,10        | 323,20        | 20                    | Qualifier            |
| UDP-glucose   | HMDB0000286 | 8,3                  | 0,001                         | 0,003                              | 3 nM - 6,25 µM      | 566,06                  | 565,10        | 79,00         | 44                    | Qualifier            |
| UDP-GalNAc    | HMDB0060522 | 10,5                 | 0,009                         | 0,030                              | 31 nM - 3,13 µM     | 607,08                  | 606,10        | 273,00        | 36                    | Qualifier            |
| UDP-GalNAc    | HMDB0060522 | 10,5                 | 0,009                         | 0,030                              | 31 nM - 3,13 µM     | 607,08                  | 606,10        | 78,90         | 50                    | Qualifier            |
| UDP-GlcNAc    | HMDB0000290 | 10,7                 | 0,003                         | 0,009                              | 9 nM - 3,13 µM      | 607,08                  | 606,10        | 385,10        | 28                    | Qualifier            |
| UDP-GlcNAc    | HMDB0000290 | 10,7                 | 0,003                         | 0,009                              | 9 nM - 3,13 µM      | 607,08                  | 606,10        | 282,10        | 30                    | Qualifier            |
| GDP-mannose   | HMDB0001163 | 13,6                 | 0,003                         | 0,009                              | 9 nM - 3,13 µM      | 605,08                  | 604,10        | 424,00        | 32                    | Qualifier            |
| GDP-mannose   | HMDB0001163 | 13,6                 | 0,003                         | 0,009                              | 9 nM - 3,13 µM      | 605,08                  | 604,10        | 78,80         | 68                    | Qualifier            |
| dTDP-glucose  | HMDB0062805 | 18,8                 | 0,003                         | 0,009                              | 9 nM - 1,25 µM      | 564,08                  | 563,10        | 321,00        | 20                    | Qualifier            |
| dTDP-glucose  | HMDB0062805 | 18,8                 | 0,003                         | 0,009                              | 9 nM - 1,25 µM      | 564,08                  | 563,10        | 79,10         | 48                    | Qualifier            |
| GDP-glucose   | HMDB0003351 | 14,9                 | 0,003                         | 0,009                              | 9 nM - 3,13 µM      | 605,08                  | 604,10        | 362,00        | 24                    | Qualifier            |
| GDP-glucose   | HMDB0003351 | 14,9                 | 0,003                         | 0,009                              | 9 nM - 3,13 µM      | 605,08                  | 604,10        | 78,90         | 44                    | Qualifier            |
| GDP-fucose    | HMDB0252660 | 17,1                 | 0,003                         | 0,009                              | 9 nM - 1,25 µM      | 589,08                  | 588,10        | 442,00        | 20                    | Qualifier            |
| GDP-fucose    | HMDB0252660 | 17,1                 | 0,003                         | 0,009                              | 9 nM - 1,25 µM      | 589,08                  | 588,10        | 424,00        | 28                    | Qualifier            |
| GDP-fucose    | HMDB0252660 | 17,1                 | 0,003                         | 0,009                              | 9 nM - 1,25 µM      | 589,08                  | 588,10        | 78,90         | 50                    | Qualifier (extra)    |
| ADP-glucose   | HMDB0006557 | 19,9                 | 0,003                         | 0,009                              | 9 nM - 9,375 µM     | 589,08                  | 588,10        | 346,20        | 24                    | Qualifier            |
| ADP-glucose   | HMDB0006557 | 19,9                 | 0,003                         | 0,009                              | 9 nM - 9,375 µM     | 589,08                  | 588,10        | 241,10        | 28                    | Qualifier            |
| ADP-ribose    | HMDB0248024 | 20                   | 0,006                         | 0,020                              | 22 nM - 12,5 µM     | 559,07                  | 558,10        | 346,20        | 24                    | Qualifier            |
| ADP-ribose    | HMDB0248024 | 20                   | 0,006                         | 0,020                              | 22 nM - 12,5 µM     | 559,07                  | 558,10        | 78,80         | 64                    | Qualifier            |
| UDP-xylose    | HMDB0001018 | 9,6                  | 0,003                         | 0,009                              | 9 nM - 3,13 µM      | 536,04                  | 535,00        | 323,20        | 20                    | Qualifier            |
| UDP-xylose    | HMDB0001018 | 9,6                  | 0,003                         | 0,009                              | 9 nM - 3,13 µM      | 536,04                  | 535,00        | 79,10         | 30                    | Qualifier            |
| UDP-arabinose | HMDB0012303 | 7,1                  | 0,001                         | 0,003                              | 3 nM - 3,13 µM      | 536,04                  | 535,00        | 322,90        | 20                    | Qualifier            |
| UDP-arabinose | HMDB0012303 | 7,1                  | 0,001                         | 0,003                              | 3 nM - 3,13 µM      | 536,04                  | 535,00        | 78,90         | 30                    | Qualifier            |
| UDP-GlcA      | HMDB0000935 | 15,4                 | 0,001                         | 0,003                              | 3 nM - 9,375 µM     | 580,03                  | 579,00        | 403,00        | 20                    | Qualifier            |
| UDP-GlcA      | HMDB0000935 | 15,4                 | 0,001                         | 0,003                              | 3 nM - 9,375 µM     | 580,03                  | 579,00        | 158,90        | 42                    | Qualifier            |
