# Supplementary material for: Dynamic tracing of sugar metabolism reveals the mechanisms of action of synthetic sugar analogs
Source: PubMed Central journal article supplement (PMC8966471; doi:10.1093/glycob/cwab106), 2021-10-25
Supplement: supplementary_table_siii_cwab106.pdf [file supplementary_table_siii_cwab106.pdf]

Table SIII. Acquisition parameters of metabolites as analyzed in the TBA method.

| Compound name                        | Chemical formula | HMDB ID     | Retention time (min) | Monoisotopic mass (amu) | Q1 mass (amu) | Q3 mass (amu) | Collision energy (eV) |
|--------------------------------------|------------------|-------------|----------------------|-------------------------|---------------|---------------|-----------------------|
| Acetyl coenzyme A                    | C23H38N7O17P3S   | HMDB0001206 | 24,0                 | 809,13                  | 808,10        | 408,00        | 36                    |
| N-Acetyl-D-galactosamine             | C8H15NO6         | HMDB0000212 | 1,5                  | 221,09                  | 220,10        | 119,00        | 0                     |
| N-Acetyl-D-galactosamine 6-phosphate | C8H16NO9P        | HMDB0059626 | 14,2                 | 301,06                  | 300,00        | 97,00         | 16                    |
| N-Acetyl-D-galactosamine 6-phosphate | C8H16NO9P        | HMDB0059626 | 14,2                 | 301,06                  | 300,00        | 79,00         | 36                    |
| N-Acetyl-D-glucosamine               | C8H15NO6         | HMDB0000215 | 1,5                  | 221,09                  | 220,10        | 59,00         | 20                    |
| N-Acetyl-D-glucosamine 1-phosphate   | C8H16NO9P        | HMDB0001367 | 14,0                 | 301,06                  | 300,00        | 97,00         | 18                    |
| N-Acetyl-D-glucosamine 1-phosphate   | C8H16NO9P        | HMDB0001367 | 14,0                 | 301,06                  | 300,00        | 79,00         | 48                    |
| N-Acetyl-D-glucosamine 6-phosphate   | C8H16NO9P        | HMDB0001062 | 13,8                 | 301,06                  | 300,00        | 97,00         | 16                    |
| N-Acetyl-D-glucosamine 6-phosphate   | C8H16NO9P        | HMDB0001062 | 13,8                 | 301,06                  | 300,00        | 79,00         | 36                    |
| N-Acetyl-D-mannosamine               | C8H15NO6         | HMDB0001129 | 1,5                  | 221,09                  | 220,10        | 59,00         | 0                     |
| N-Acetyl-D-mannosamine 6-phosphate   | C8H16NO9P        | HMDB0062500 | 14,5                 | 301,06                  | 300,10        | 87,10         | 9                     |
| N-Acetyl-D-mannosamine 6-phosphate   | C8H16NO9P        | HMDB0062500 | 14,5                 | 301,06                  | 300,10        | 78,90         | 41                    |
| N-Acetylneuraminic acid              | C11H19NO9        | HMDB0000230 | 7,0                  | 309,11                  | 308,10        | 169,90        | 10                    |
| N-Acetylneuraminic acid              | C11H19NO9        | HMDB0000230 | 7,0                  | 309,11                  | 308,10        | 87,00         | 14                    |
| N-Acetylneuraminic acid 9-phosphate  | C13H21NO10       | HMDB0000794 | 20,9                 | 351,12                  | 388,10        | 79,00         | 41                    |
| Adenine                              | C5H5N5           | HMDB0000034 | 2,9                  | 135,05                  | 134,00        | 107,00        | 18                    |
| Adenine                              | C5H5N5           | HMDB0000034 | 2,9                  | 135,05                  | 134,00        | 92,10         | 20                    |
| Adenosine 5-monophosphate            | C10H14N5O7P      | HMDB0000045 | 19,0                 | 347,06                  | 346,00        | 97,00         | 24                    |
| Adenosine 5-monophosphate            | C10H14N5O7P      | HMDB0000045 | 19,0                 | 347,06                  | 346,00        | 79,00         | 38                    |
| Adenosine 5-diphosphate              | C10H15N5O10P2    | HMDB0001341 | 22,0                 | 427,03                  | 426,00        | 328,00        | 16                    |
| Adenosine 5-diphosphate              | C10H15N5O10P2    | HMDB0001341 | 22,0                 | 427,03                  | 426,00        | 159,00        | 28                    |
| Adenosine 5-triphosphate             | C10H16N5O13P3    | HMDB0000538 | 23,2                 | 507,00                  | 506,00        | 408,10        | 22                    |
| Adenosine 5-triphosphate             | C10H16N5O13P3    | HMDB0000538 | 23,2                 | 507,00                  | 506,00        | 159,00        | 38                    |
| L-Arabinose                          | C5H10O5          | HMDB0000646 | 3,0                  | 150,05                  | 149,00        | 89,10         | 4                     |
| L-Arabinose                          | C5H10O5          | HMDB0000646 | 3,0                  | 150,05                  | 149,00        | 59,20         | 12                    |
| L-Arabitol                           | C5H12O5          | HMDB0001851 | 1,5                  | 152,07                  | 151,00        | 89,00         | 12                    |
| L-Arabitol                           | C5H12O5          | HMDB0001851 | 1,5                  | 152,07                  | 151,00        | 71,02         | 16                    |
| CDP-ribitol                          | C14H25N3O15P2    | n.a.        | 20,5                 | 537,08                  | 536,10        | 322,00        | 20                    |
| CDP-ribitol                          | C14H25N3O15P2    | n.a.        | 20,5                 | 537,08                  | 536,10        | 78,80         | 50                    |
| CMP-NeuNAc                           | C20H31N4O16P     | HMDB0001176 | 20,5                 | 614,15                  | 613,14        | 321,90        | 20                    |
| CMP-NeuNAc                           | C20H31N4O16P     | HMDB0001176 | 20,5                 | 614,15                  | 613,14        | 78,90         | 54                    |
| Cytidine                             | C9H13N3O5        | HMDB0000089 | 1,8                  | 243,09                  | 242,10        | 109,00        | 8                     |
| Cytidine                             | C9H13N3O5        | HMDB0000089 | 1,8                  | 243,09                  | 242,10        | 42,20         | 16                    |
| Cytidine 5-monophosphate             | C9H14N3O8P       | HMDB0000095 | 15,5                 | 323,05                  | 322,00        | 97,00         | 22                    |
| Cytidine 5-monophosphate             | C9H14N3O8P       | HMDB0000095 | 15,5                 | 323,05                  | 322,00        | 79,00         | 44                    |
| Cytidine 5-diphosphate               | C9H15N3O11P2     | HMDB0001546 | 21,0                 | 403,02                  | 402,01        | 158,92        | 24                    |
| Cytidine 5-diphosphate               | C9H15N3O11P2     | HMDB0001546 | 21,0                 | 403,02                  | 402,01        | 79,00         | 48                    |
| Cytidine 5-triphosphate              | C9H16N3O14P3     | HMDB0000082 | 23,0                 | 482,98                  | 482,00        | 158,80        | 40                    |
| Cytidine 5-triphosphate              | C9H16N3O14P3     | HMDB0000082 | 23,0                 | 482,98                  | 482,00        | 79,00         | 40                    |
| D-Erythrose 4-phosphate              | C4H9O7P          | HMDB0001321 | 14,0                 | 200,01                  | 199,00        | 97,00         | 14                    |
| D-Erythrose 4-phosphate              | C4H9O7P          | HMDB0001321 | 14,0                 | 200,01                  | 199,00        | 79,00         | 48                    |
| D-Fructose 1-phosphate               | C6H12O6          | HMDB0062538 | 14,0                 | 180,06                  | 259,00        | 97,00         | 14                    |
| D-Fructose 1-phosphate               | C6H12O6          | HMDB0062538 | 14,0                 | 180,06                  | 259,00        | 79,00         | 48                    |
| D-Fructose 6-phosphate               | C6H13O9P         | HMDB0000124 | 13,5                 | 260,03                  | 259,00        | 97,00         | 14                    |
| D-Fructose 6-phosphate               | C6H13O9P         | HMDB0000124 | 13,5                 | 260,03                  | 259,00        | 79,00         | 48                    |
| D-Fructose 1,6-bisphosphate          | C6H14O12P2       | HMDB0001058 | 20,3                 | 340,00                  | 338,90        | 241,01        | 12                    |
| D-Fructose 1,6-bisphosphate          | C6H14O12P2       | HMDB0001058 | 20,3                 | 340,00                  | 338,90        | 97,00         | 22                    |
| Galactitol                           | C6H14O6          | HMDB0000107 | 1,4                  | 182,08                  | 181,07        | 101,00        | 13                    |
| Galactitol                           | C6H14O6          | HMDB0000107 | 1,4                  | 182,08                  | 181,07        | 59,00         | 20                    |
| Galactonic acid                      | C6H12O7          | HMDB0000565 | 4,0                  | 196,06                  | 195,10        | 129,00        | 11                    |
| Galactonic acid                      | C6H12O7          | HMDB0000565 | 4,0                  | 196,06                  | 195,10        | 75,10         | 18                    |
| D-Galactose 1-phosphate              | C6H13O9P         | HMDB0000645 | 13,4                 | 260,03                  | 259,00        | 240,90        | 9                     |
| D-Galactose 1-phosphate              | C6H13O9P         | HMDB0000645 | 13,4                 | 260,03                  | 259,00        | 79,00         | 28                    |
| Glucose                              | C6H12O6          | HMDB0000122 | 1,4                  | 180,06                  | 179,10        | 89,10         | 5                     |
| Glucose                              | C6H12O6          | HMDB0000122 | 1,4                  | 180,06                  | 179,10        | 59,00         | 17                    |
| D-Glucose 1-phosphate                | C6H13O9P         | HMDB0001586 | 13,6                 | 260,03                  | 259,00        | 240,90        | 9                     |
| D-Glucose 1-phosphate                | C6H13O9P         | HMDB0001586 | 13,6                 | 260,03                  | 259,00        | 79,00         | 28                    |
| D-Glucose 6-phosphate                | C6H13O9P         | HMDB0001401 | 12,9                 | 260,03                  | 259,00        | 97,00         | 14                    |
| D-Glucose 6-phosphate                | C6H13O9P         | HMDB0001401 | 12,9                 | 260,03                  | 259,00        | 79,00         | 48                    |
| Glucuronic acid                      | C6H10O7          | HMDB0000127 | 5,0                  | 194,04                  | 193,00        | 113,00        | 14                    |
| L-Glutamine                          | C5H10N2O3        | HMDB0000641 | 1,4                  | 146,07                  | 145,10        | 127,00        | 7                     |
| L-Glutamine                          | C5H10N2O3        | HMDB0000641 | 1,4                  | 146,07                  | 145,10        | 109,00        | 10                    |
| Glyceraldehyde 3-phosphate           | C3H7O6P          | HMDB0001112 | 14,0                 | 170,00                  | 169,00        | 97,00         | 4                     |
| Glyceraldehyde 3-phosphate           | C3H7O6P          | HMDB0001112 | 14,0                 | 170,00                  | 169,00        | 79,00         | 28                    |
| N-Glycolylneuraminic acid            | C11H19NO10       | HMDB0000833 | 6,0                  | 325,10                  | 324,09        | 116,00        | 13                    |
| N-Glycolylneuraminic acid            | C11H19NO10       | HMDB0000833 | 6,0                  | 325,10                  | 324,09        | 87,10         | 25                    |
| Guanine                              | C5H5N5O          | HMDB0000132 | 3,0                  | 151,05                  | 150,00        | 133,02        | 12                    |
| Guanine                              | C5H5N5O          | HMDB0000132 | 3,0                  | 151,05                  | 150,00        | 66,01         | 36                    |
| Guanosine                            | C10H13N5O5       | HMDB0000133 | 8,8                  | 283,09                  | 282,10        | 150,00        | 17                    |
| Guanosine                            | C10H13N5O5       | HMDB0000133 | 8,8                  | 283,09                  | 282,10        | 132,90        | 32                    |
| Mannitol                             | C6H14O6          | HMDB0000765 | 14,0                 | 182,08                  | 181,10        | 71,00         | 22                    |
| D-Mannose                            | C6H12O6          | HMDB0000169 | 1,4                  | 180,06                  | 179,10        | 89,00         | 4                     |
| D-Mannose                            | C6H12O6          | HMDB0000169 | 1,4                  | 180,06                  | 179,10        | 59,20         | 16                    |
| D-Mannose 1-phosphate                | C6H13O9P         | HMDB0006330 | 13,5                 | 260,03                  | 259,00        | 79,00         | 28                    |
| D-Mannose 6-phosphate                | C6H13O9P         | HMDB0001078 | 13,1                 | 260,03                  | 259,00        | 97,00         | 14                    |
| D-Mannose 6-phosphate                | C6H13O9P         | HMDB0001078 | 13,1                 | 260,03                  | 259,00        | 79,00         | 48                    |
| Phosphoenolpyruvic acid              | C3H5O6P          | HMDB0000263 | 21,7                 | 167,98                  | 167,00        | 79,00         | 12                    |
| 6-Phosphogluconic acid               | C6H13O10P        | HMDB0001316 | 14,0                 | 276,02                  | 275,00        | 79,00         | 50                    |
| 5-Phosphoribosyl 1-pyrophosphate     | C5H13O14P3       | HMDB0000280 | 16,0                 | 389,95                  | 388,90        | 291,00        | 9                     |
| 5-Phosphoribosyl 1-pyrophosphate     | C5H13O14P3       | HMDB0000280 | 16,0                 | 389,95                  | 388,90        | 177,00        | 25                    |
| 5-Phosphoribosyl 1-pyrophosphate     | C5H13O14P3       | HMDB0000280 | 16,0                 | 389,95                  | 388,90        | 79,00         | 50                    |
| 5-Phosphoribosylamine                | C5H12NO7P        | HMDB0001128 | 1,5                  | 229                     | 228,00        | 97,00         | 10                    |
| 5-Phosphoribosylamine                | C5H12NO7P        | HMDB0001128 | 1,5                  | 229                     | 228,00        | 79,00         | 48                    |

|                                  |               |             |      |        |        |        |    |
|----------------------------------|---------------|-------------|------|--------|--------|--------|----|
| Pyruvic acid                     | C3H4O3        | HMDB0000243 | 15,1 | 88,02  | 87,00  | 43,20  | 4  |
| Ribitol                          | C5H12O5       | HMDB0000508 | 1,5  | 152,07 | 151,10 | 89,20  | 9  |
| Ribitol                          | C5H12O5       | HMDB0000508 | 1,5  | 152,07 | 151,10 | 71,10  | 17 |
| Ribitol 5-phosphate              | C5H13O8P      | n.a.        | 13,5 | 232,03 | 231,00 | 97,00  | 12 |
| Ribitol 5-phosphate              | C5H13O8P      | n.a.        | 13,5 | 232,03 | 231,00 | 79,00  | 50 |
| D-Ribose 5-phosphate             | C5H11O8P      | HMDB0001548 | 13,5 | 230,02 | 229,00 | 97,00  | 10 |
| D-Ribose 5-phosphate             | C5H11O8P      | HMDB0001548 | 13,5 | 230,02 | 229,00 | 79,00  | 48 |
| D-Ribose 1-phosphate             | C5H11O8P      | HMDB0001489 | 15,5 | 230,02 | 229,00 | 97,00  | 10 |
| D-Ribose 1-phosphate             | C5H11O8P      | HMDB0001489 | 15,5 | 230,02 | 229,00 | 79,00  | 48 |
| Ribulose 5-phosphate             | C5H11O8P      | HMDB0000618 | 14,5 | 230,02 | 229,01 | 97,00  | 14 |
| Ribulose 5-phosphate             | C5H11O8P      | HMDB0000618 | 14,5 | 230,02 | 229,01 | 79,00  | 48 |
| D-Sedoheptulose 7-phosphate      | C7H15O10P     | HMDB0001068 | 13,5 | 290,04 | 289,00 | 96,90  | 18 |
| D-Sedoheptulose 7-phosphate      | C7H15O10P     | HMDB0001068 | 13,5 | 290,04 | 289,00 | 79,00  | 48 |
| D-Sedoheptulose 1,7-bisphosphate | C7H16O13P2    | HMDB0060274 | 21,2 | 370,01 | 369,00 | 97,00  | 14 |
| D-Sedoheptulose 1,7-bisphosphate | C7H16O13P2    | HMDB0060274 | 21,2 | 370,01 | 369,00 | 79,00  | 48 |
| Sorbitol                         | C6H14O6       | HMDB0000247 | 1,6  | 182,08 | 181,10 | 101,00 | 13 |
| Sorbitol                         | C6H14O6       | HMDB0000247 | 1,6  | 182,08 | 181,10 | 59,00  | 21 |
| Trehalose                        | C12H22O11     | HMDB0000975 | 1,5  | 342,12 | 341,00 | 89,01  | 12 |
| UDP-GlcNAc                       | C17H27N3O17P2 | HMDB0000290 | 20,8 | 607,08 | 606,07 | 385,10 | 28 |
| UDP-GlcNAc                       | C17H27N3O17P2 | HMDB0000290 | 20,8 | 607,08 | 606,07 | 282,20 | 30 |
| Uridine                          | C9H12N2O6     | HMDB0000296 | 4,0  | 244,07 | 243,10 | 200,00 | 6  |
| Uridine                          | C9H12N2O6     | HMDB0000296 | 4,0  | 244,07 | 243,10 | 110,00 | 12 |
| Xylitol                          | C5H12O5       | HMDB0002917 | 1,5  | 152,07 | 151,10 | 89,00  | 8  |
| Xylitol                          | C5H12O5       | HMDB0002917 | 1,5  | 152,07 | 151,10 | 71,00  | 8  |
| D-Xylose                         | C5H10O5       | HMDB0000098 | 4,0  | 150,05 | 149,05 | 89,02  | 4  |
| D-Xylose                         | C5H10O5       | HMDB0000098 | 4,0  | 150,05 | 149,05 | 71,01  | 4  |
| D-Xylulose 5-phosphate           | C5H11O8P      | HMDB0000868 | 14,3 | 230,02 | 229,00 | 138,98 | 8  |
| D-Xylulose 5-phosphate           | C5H11O8P      | HMDB0000868 | 14,3 | 230,02 | 229,00 | 79,00  | 36 |
