# Supplementary material for: Dynamic tracing of sugar metabolism reveals the mechanisms of action of synthetic sugar analogs
Source: PubMed Central journal article supplement (PMC8966471; doi:10.1093/glycob/cwab106), 2021-10-25
Supplement: supplementary_table_siv_cwab106.pdf [file supplementary_table_siv_cwab106.pdf]

Table SIV. Comparative analysis of the relative abundance of nucleotide sugars in 13 organisms or cell lines.

Relative levels of nucleotide sugars in HAP1 cells cultured under different conditions (supplementary Figure 3)

|                 | CMP-NeuNAc | CMP-ribitol | CMP-NeuNAc | UDP-arabinose | UDP-galactose | UDP-glucose | UDP-xylose | UDP-MannNAc | UDP-glucNAc | UDP-GalNAc | GDP-mannose | GDP-glucose | UDP-GlucA | GDP-fructose | TDP-glucose | TDP-fructose | ADP-glucose | ADP-fructose |
|-----------------|------------|-------------|------------|---------------|---------------|-------------|------------|-------------|-------------|------------|-------------|-------------|-----------|--------------|-------------|--------------|-------------|--------------|
| [-H] DMEM High  | 0.09       | 0.95        | 5.15       | 0.12          | 0.01          | 30.21       | 0.51       | n.d.        | 25.55       | 4.95       | 0.74        | n.d.        | 14.65     | 0.83         | n.d.        | n.d.         | n.d.        | n.d.         |
| [-H] DMEM High  | 0.07       | 0.30        | 3.78       | 0.12          | 10.75         | 40.65       | 0.50       | n.d.        | 23.11       | 4.15       | 0.61        | n.d.        | 14.64     | 0.88         | n.d.        | n.d.         | n.d.        | 0.63         |
| [-H] DMEM High  | 0.08       | 0.31        | 5.11       | 0.15          | 10.34         | 37.29       | 0.55       | n.d.        | 25.17       | 4.19       | 0.81        | n.d.        | 14.28     | 0.95         | n.d.        | n.d.         | n.d.        | 0.75         |
| [-H] DMEM low   | 0.10       | 0.54        | 4.47       | 0.12          | 10.86         | 42.47       | 0.85       | n.d.        | 21.95       | 3.64       | 0.81        | n.d.        | 12.37     | 1.06         | n.d.        | n.d.         | n.d.        | 0.76         |
| [-H] DMEM -2.75 | 0.11       | 0.61        | 4.60       | 0.06          | 10.80         | 39.49       | 0.74       | n.d.        | 22.01       | 3.91       | 0.98        | n.d.        | 14.62     | 0.97         | n.d.        | n.d.         | n.d.        | 1.07         |
| [-H] DMEM low   | 0.07       | 0.71        | 4.98       | 0.08          | 10.07         | 40.01       | 1.02       | n.d.        | 22.49       | 3.95       | 0.97        | n.d.        | 13.07     | 1.05         | n.d.        | n.d.         | n.d.        | 1.51         |

Relative levels of nucleotide sugars in organisms and cells (Figure 2)

|                         | CMP-NeuNAc | CMP-ribitol | CMP-NeuNAc | UDP-arabinose | UDP-galactose | UDP-glucose | UDP-xylose | UDP-MannNAc | UDP-glucNAc | UDP-GalNAc | GDP-mannose | GDP-glucose | UDP-GlucA | GDP-fructose | TDP-glucose | TDP-fructose | ADP-glucose | ADP-fructose |
|-------------------------|------------|-------------|------------|---------------|---------------|-------------|------------|-------------|-------------|------------|-------------|-------------|-----------|--------------|-------------|--------------|-------------|--------------|
| Human WT fibroblasts    | 0.16       | 1.76        | 4.23       | 0.13          | 0.50          | 20.25       | 0.65       | 0.00        | 24.58       | 22.41      | 1.18        | 0.00        | 5.32      | 1.09         | 0.00        | 0.00         | 0.00        | 0.71         |
| HEK293                  | 0.23       | 0.51        | 9.11       | 0.09          | 6.47          | 19.53       | 0.47       | 0.00        | 32.46       | 21.26      | 1.86        | 0.00        | 6.15      | 1.45         | 0.00        | 0.00         | 0.00        | 0.40         |
| HAP1                    | 0.04       | 0.32        | 3.14       | 0.09          | 6.47          | 22.95       | 0.28       | 0.00        | 31.74       | 20.85      | 1.27        | 0.00        | 11.87     | 0.70         | 0.00        | 0.00         | 0.00        | 0.25         |
| Mouse C2C12 myotubes    | 0.25       | 2.84        | 5.96       | 0.50          | 14.02         | 41.69       | 1.47       | 0.00        | 10.73       | 7.35       | 0.75        | 0.00        | 13.38     | 0.86         | 0.00        | 0.00         | 0.00        | 0.64         |
| Mouse C2C12 myotubes    | 0.82       | 7.52        | 3.87       | 0.02          | 8.64          | 21.06       | 0.67       | 0.00        | 28.27       | 17.96      | 0.84        | 0.00        | 9.71      | 0.56         | 0.00        | 0.00         | 0.00        | 0.04         |
| Fibroblast adult        | 4.89       | 1.69        | 27.16      | 0.84          | 0.80          | 2.67        | 0.47       | 0.00        | 35.73       | 23.14      | 0.17        | 0.02        | 2.22      | 0.33         | 0.02        | 0.04         | 0.08        | 0.09         |
| Zebrafish embryo        | 4.25       | 1.55        | 12.70      | 0.22          | 3.72          | 12.90       | 0.58       | 0.00        | 35.99       | 21.17      | 0.08        | 0.02        | 1.83      | 0.86         | 0.01        | 0.00         | 0.00        | 2.11         |
| Canton R male flies     | 0.00       | 0.00        | 0.03       | 0.32          | 14.08         | 45.98       | 0.24       | 0.00        | 22.13       | 4.64       | 5.26        | 0.08        | 3.49      | 0.57         | 0.04        | 0.00         | 0.17        | 2.97         |
| Canton R female flies   | 0.00       | 0.01        | 0.03       | 0.26          | 12.62         | 37.88       | 0.24       | 0.00        | 27.79       | 5.25       | 7.24        | 0.06        | 4.53      | 0.65         | 0.04        | 0.00         | 0.15        | 2.86         |
| Canton R Virgin females | 0.00       | 0.01        | 0.03       | 0.41          | 13.25         | 28.90       | 0.27       | 0.00        | 34.73       | 6.73       | 4.80        | 0.08        | 3.71      | 0.51         | 0.07        | 0.00         | 0.21        | 6.28         |
| Yeast                   | 0.00       | 0.00        | 0.00       | 0.00          | 2.31          | 46.24       | 0.00       | 0.00        | 22.41       | 0.04       | 25.98       | 0.04        | 0.02      | 0.00         | 0.01        | 0.00         | 0.04        | 2.91         |
| Bacteria gram positive  | 0.02       | 0.05        | 0.04       | 0.01          | 4.58          | 19.57       | 0.02       | 0.00        | 31.85       | 3.98       | 0.03        | 0.02        | 0.01      | 0.01         | 0.81        | 35.43        | 0.34        | 1.57         |
| Bacteria gram negative  | 0.00       | 13.97       | 0.00       | 0.02          | 3.02          | 10.51       | 0.01       | 0.41        | 28.85       | 18.54      | 0.07        | 0.01        | 0.03      | 0.00         | 0.06        | 22.81        | 1.22        | 0.46         |
