# Supplementary material for: Dynamic tracing of sugar metabolism reveals the mechanisms of action of synthetic sugar analogs
Source: PubMed Central journal article supplement (PMC8966471; doi:10.1093/glycob/cwab106), 2021-10-25
Supplement: supplementary_table_svi_cwab106.pdf [file supplementary_table_svi_cwab106.pdf]

**Table SVI. Overview of the effects of 3Fax-NeuNAc on all nucleotide sugars**

A. The relative abundances of nucleotide sugars are shown (in %) after 48 h incubation of B16-F10 cells with Ac<sub>3</sub>-3Fax-NeuNAc, Ac<sub>3</sub>NeuNAc or PBS (control). In addition, the incorporation of Ac<sub>3</sub>-3Fax-NeuNAc is shown as ratio of the theoretically produced fluoro derivatives versus endogenous, non-modified nucleotide sugars.

| Sample        | CDP-ribitol | CMP-NeuNAc | CMP-3Fax-NeuNAc | UDP-galactose | UDP-glucose | UDP-arabinose | UDP-xylose | UDP-GlcNAc |
|---------------|-------------|------------|-----------------|---------------|-------------|---------------|------------|------------|
| Average       |             |            |                 |               |             |               |            |            |
| 3Fax-NeuNAc   | 0,231       | 0,291      | 34,474          | 11,153        | 33,117      | 0,086         | 0,680      | 1,167      |
| NeuNAc        | 0,331       | 9,564      | 0,006           | 15,937        | 48,493      | 0,124         | 1,040      | 1,407      |
| Control (PBS) | 0,367       | 8,278      | 0,034           | 16,096        | 49,014      | 0,122         | 1,037      | 1,519      |

| Sample        | UDP-GalNAc | GDP-glucose | GDP-mannose | UDP-GlcA | GDP-fucose | ADP-glucose | TDP-glucose | ADP-ribose |
|---------------|------------|-------------|-------------|----------|------------|-------------|-------------|------------|
| Average       |            |             |             |          |            |             |             |            |
| 3Fax-NeuNAc   | 15,939     | 0,000       | 0,033       | 2,068    | 0,618      | 0,014       | 0,001       | 0,101      |
| NeuNAc        | 19,111     | 0,001       | 0,051       | 2,790    | 0,932      | 0,014       | 0,001       | 0,153      |
| Control (PBS) | 19,640     | 0,001       | 0,049       | 2,738    | 0,895      | 0,016       | 0,006       | 0,152      |

B. The relative abundances of nucleotide sugars are shown (in %) after 0, 4, 8, 24 and 48 h of incubation of fibroblast control and Sialuria cells with Ac<sub>3</sub>-3Fax-NeuNAc. In addition, the incorporation of Ac<sub>3</sub>-3Fax-NeuNAc is shown as ratio of the theoretically produced fluoro derivatives versus endogenous, non-modified nucleotide sugars.

| Genotype | Time [h] | CDP-ribitol | CMP-NeuNAc | CMP-3Fax-NeuNAc | UDP-galactose | UDP-glucose | UDP-arabinose | UDP-xylose | UDP-HexNAc | GDP-mannose | UDP-GlcA | GDP-fucose | ADP-ribose |
|----------|----------|-------------|------------|-----------------|---------------|-------------|---------------|------------|------------|-------------|----------|------------|------------|
| Control  | 0        | 0,42        | 3,59       | 0,00            | 10,35         | 34,63       | 0,07          | 0,83       | 34,40      | 0,97        | 12,05    | 1,55       | 1,14       |
|          | 4        | 0,40        | 2,69       | 0,95            | 9,95          | 33,91       | 0,05          | 0,64       | 31,94      | 0,87        | 16,76    | 0,93       | 0,90       |
|          | 8        | 0,38        | 0,65       | 4,03            | 10,37         | 35,73       | 0,04          | 0,70       | 31,41      | 0,81        | 13,81    | 1,22       | 0,81       |
|          | 24       | 0,39        | 0,42       | 14,30           | 8,90          | 30,62       | 0,04          | 0,61       | 25,99      | 0,92        | 15,58    | 1,36       | 0,85       |
|          | 48       | 0,32        | 0,46       | 16,66           | 8,44          | 28,04       | 0,05          | 0,62       | 31,16      | 0,72        | 11,39    | 1,37       | 0,75       |
| Sialuria | 0        | 0,46        | 34,50      | 0,00            | 6,74          | 23,34       | 0,04          | 0,49       | 24,10      | 0,78        | 7,22     | 1,03       | 1,28       |
|          | 4        | 0,44        | 34,72      | 0,02            | 6,64          | 22,64       | 0,03          | 0,47       | 23,62      | 0,74        | 8,66     | 0,98       | 1,01       |
|          | 8        | 0,44        | 33,11      | 0,08            | 7,09          | 24,55       | 0,02          | 0,46       | 23,20      | 0,76        | 8,26     | 1,00       | 1,00       |
|          | 24       | 0,52        | 31,33      | 1,16            | 7,35          | 24,99       | 0,03          | 0,51       | 23,33      | 0,79        | 7,62     | 1,06       | 1,29       |
|          | 48       | 0,39        | 31,14      | 2,72            | 6,94          | 23,12       | 0,04          | 0,51       | 24,87      | 0,73        | 7,33     | 1,07       | 1,11       |
